# Supplementary material for: Total Burden of Cerebral Small Vessel Disease on MRI May Predict Cognitive Impairment in Parkinson’s Disease
Source: MDPI journal article supplement (doi:10.3390/jcm11185381), 2022-09-13
Supplement: s1 [file s1]

**Table S1.** Multivariate binary logistic regression analyses of clinical factors associated with cognitive impairment in PD.

|                 | OR    | 95%CI       | <i>p</i> |
|-----------------|-------|-------------|----------|
| Education level | 0.285 | 0.171–0.476 | 0.000 *  |
| PVH             | 2.523 | 1.232–5.167 | 0.011 *  |
| CSVD            | 2.583 | 1.342–4.969 | 0.004 *  |

Note: \*  $p < 0.05$ .

**Table S2.** Correlation analysis of Education level and clinical factors

|               | <i>r</i> | <i>p</i> |
|---------------|----------|----------|
| Midbrain-EPVS | 0.010    | 0.915    |
| SLI           | −0.159   | 0.081    |
| CMB           | −0.042   | 0.648    |
| DWMH          | 0.049    | 0.592    |
| PVH           | 0.009    | 0.919    |
| CS-EPVS       | 0.046    | 0.681    |
| BG-EPVS       | −0.051   | 0.579    |
| CSVD          | −0.153   | 0.093    |
